# Supplementary material for: Dose-Dependent Response to Infection with Ebola Virus in the Ferret Model and Evidence of Viral Evolution in the Eye
Source: PubMed Central journal article supplement (PMC8610581; doi:10.1128/jvi.00833-21), 2021-11-23
Supplement: jvi.00833-21-s0001.pdf [file jvi.00833-21-s0001.pdf]

| <b>Supplementary Table 1. Characterisation of Zaire Ebola virus kikwit</b> |                                                   |
|----------------------------------------------------------------------------|---------------------------------------------------|
| Sequence analysis of Glycoprotein gene                                     | 100% homology with Mayinga EBOV Glycoprotein gene |
| Deep sequence analysis                                                     | 86.8 % 7U                                         |
| Plaque assay titre                                                         | $1.35 \times 10^4$ pfu / mL                       |
| TCID <sub>50</sub> titre                                                   | $5.6 \times 10^6$ TCID <sub>50</sub> / mL         |
| Genomic RNA qRT-PCR                                                        | $4.87 \times 10^{11}$ GE / mL                     |
| Virus particle count TEM <sup>1</sup>                                      | $2.2 \times 10^9$ Vp / mL                         |
| Virus particle count ViroCyt <sup>2</sup>                                  | $5.5 \times 10^8$ Vp / mL                         |
| Ratio of genomic equivalents to PFU                                        | 36074074:1                                        |
| Ratio of virus particles (Virocyt) to PFU                                  | 40740:1                                           |

**Supplementary Table 1. Zaire ebolavirus (Strain Kikwit-95) characterisation.** The Zaire ebolavirus stock used for these experiments has been extensively characterised. The stock has been sequenced, titred and particle ratios have been calculated. <sup>1</sup>By Transmission Electron Microscope Particle Count. <sup>2</sup>As determined using the ViroCyt 3100 Virus counter.

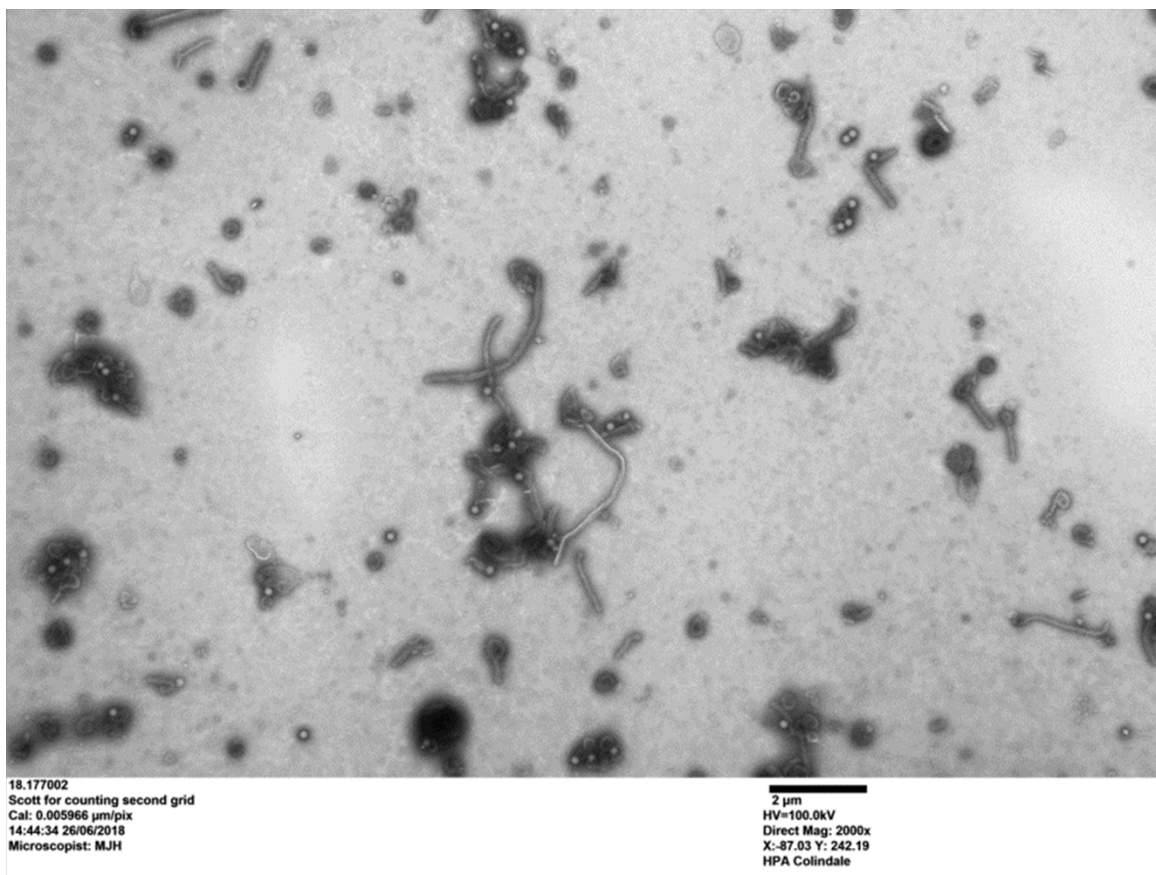

**Supplementary Fig. 1 Electron Microscopy of Zaire ebolavirus (Kikwit-95) stock.** The Ebola virus stock was observed under electron microscopy. Typical filovirus particles can be observed in the centre of the image and smaller particles can be observed on the outer edges of the image.

| Study | Group                  | Virus Dose (TCID <sub>50</sub> ) | Ferret | Time post challenge (Days) |   |   |   |   |   |   |   |   |    |    |    |    |    |   |   |
|-------|------------------------|----------------------------------|--------|----------------------------|---|---|---|---|---|---|---|---|----|----|----|----|----|---|---|
|       |                        |                                  |        | 1                          | 2 | 3 | 4 | 5 | 6 | 7 | 8 | 9 | 10 | 11 | 12 | 13 | 14 |   |   |
| 1     | 1                      | 5.6 x 10 <sup>4</sup>            | 1      | █                          | █ | █ | █ | █ | █ | █ | █ | █ | █  | █  | █  | █  | █  |   |   |
|       |                        |                                  | 2      | █                          | █ | █ | █ | █ | █ | █ | █ | █ | █  | █  | █  | █  | █  | █ |   |
|       |                        |                                  | 3      | █                          | █ | █ | █ | █ | █ | █ | █ | █ | █  | █  | █  | █  | █  | █ |   |
|       | 2                      | 5.6 x 10 <sup>1</sup>            | 1      | █                          | █ | █ | █ | █ | █ | █ | █ | █ | █  | █  | █  | █  | █  |   |   |
|       |                        |                                  | 2      | █                          | █ | █ | █ | █ | █ | █ | █ | █ | █  | █  | █  | █  | █  | █ |   |
|       |                        |                                  | 3      | █                          | █ | █ | █ | █ | █ | █ | █ | █ | █  | █  | █  | █  | █  | █ |   |
| 2     | 1                      | 5.6 x 10 <sup>1</sup>            | 1      | █                          | █ | █ | █ | █ | █ | █ | █ | █ | █  | █  | █  | █  | █  |   |   |
|       |                        |                                  | 2      | █                          | █ | █ | █ | █ | █ | █ | █ | █ | █  | █  | █  | █  | █  | █ |   |
|       |                        |                                  | 3      | █                          | █ | █ | █ | █ | █ | █ | █ | █ | █  | █  | █  | █  | █  | █ |   |
|       | 2                      | 5.6 x 10 <sup>0</sup>            | 1      | █                          | █ | █ | █ | █ | █ | █ | █ | █ | █  | █  | █  | █  | █  | █ |   |
|       |                        |                                  | 2      | █                          | █ | █ | █ | █ | █ | █ | █ | █ | █  | █  | █  | █  | █  | █ |   |
|       |                        |                                  | 3      | █                          | █ | █ | █ | █ | █ | █ | █ | █ | █  | █  | █  | █  | █  | █ | █ |
|       | 3                      | 5.6 x 10 <sup>-1</sup>           | 1      | █                          | █ | █ | █ | █ | █ | █ | █ | █ | █  | █  | █  | █  | █  | █ |   |
|       |                        |                                  | 2      | █                          | █ | █ | █ | █ | █ | █ | █ | █ | █  | █  | █  | █  | █  | █ | █ |
|       |                        |                                  | 3      | █                          | █ | █ | █ | █ | █ | █ | █ | █ | █  | █  | █  | █  | █  | █ | █ |
| 3     | 1                      | 5.6 x 10 <sup>-1</sup>           | 1      | █                          | █ | █ | █ | █ | █ | █ | █ | █ | █  | █  | █  | █  | █  | █ |   |
|       |                        |                                  | 2      | █                          | █ | █ | █ | █ | █ | █ | █ | █ | █  | █  | █  | █  | █  | █ | █ |
|       |                        |                                  | 3      | █                          | █ | █ | █ | █ | █ | █ | █ | █ | █  | █  | █  | █  | █  | █ | █ |
|       | 2                      | 5.6 x 10 <sup>-2</sup>           | 1      | █                          | █ | █ | █ | █ | █ | █ | █ | █ | █  | █  | █  | █  | █  | █ | █ |
|       |                        |                                  | 2      | █                          | █ | █ | █ | █ | █ | █ | █ | █ | █  | █  | █  | █  | █  | █ | █ |
|       |                        |                                  | 3      | █                          | █ | █ | █ | █ | █ | █ | █ | █ | █  | █  | █  | █  | █  | █ | █ |
| 4     | 5.6 x 10 <sup>-3</sup> | 1                                | █      | █                          | █ | █ | █ | █ | █ | █ | █ | █ | █  | █  | █  | █  | █  | █ |   |
|       |                        | 2                                | █      | █                          | █ | █ | █ | █ | █ | █ | █ | █ | █  | █  | █  | █  | █  | █ | █ |
|       |                        | 3                                | █      | █                          | █ | █ | █ | █ | █ | █ | █ | █ | █  | █  | █  | █  | █  | █ | █ |

**Supplementary Fig 2. Study Design.** Ferrets were monitored for clinical signs, weight and temperature and were sampled daily for EDTA blood for PCR, Lithium heparin blood for VetScan blood chemistry, Oral and Rectal swabs for PCR according to the schedule.

| Study | Group | Virus Dose (TCID <sub>50</sub> ) | Animal ID              | Time to euthanasia (day) | Clinical signs at euthanasia decision | Total summed clinical score |
|-------|-------|----------------------------------|------------------------|--------------------------|---------------------------------------|-----------------------------|
| 1     | 1     | 5.6 x 10 <sup>4</sup>            | 18011                  | 3.26                     | G, A, Lb                              | 5                           |
|       |       |                                  | 18453                  | 2.76                     | G, A, L                               | 6                           |
|       |       |                                  | 18568                  | 3.26                     | G, A                                  | 2                           |
|       | 2     | 5.6 x 10 <sup>1</sup>            | 17193                  | 4.09                     | W, G, A                               | 3                           |
|       |       |                                  | 18016                  | 5.09                     | W, G, A, Lb, S, D                     | 10                          |
| 2     | 1     | 5.6 x 10 <sup>1</sup>            | 00088                  | 5.03                     | W, A, R, D, L, V, Do                  | 20                          |
|       |       |                                  | 16385                  | 5.03                     | W, A, Lb, R, Ra, D, L, V, Do          | 23                          |
|       |       |                                  | 00468                  | 4.17                     | W, G, A, Lb, L                        | 10                          |
|       | 2     | 5.6 x 10 <sup>0</sup>            | 99894                  | 5.44                     | W, G, A, Lb, R, L                     | 10                          |
|       |       |                                  | 00545                  | 5.37                     | W, G, A, Lb, R, Ra, L                 | 11                          |
|       |       |                                  | 00230                  | 5.37                     | W, G, A, Lb, R, Ra, L                 | 13                          |
|       | 3     | 5.6 x 10 <sup>-1</sup>           | 21954                  | 5.84                     | A, Lb, R, Ra, L                       | 9                           |
|       |       |                                  | 01755                  | 5.84                     | W, A, R, Ra, L                        | 8                           |
|       |       |                                  | 99938                  | 5.84                     | W, A, Lb, R, I                        | 17                          |
|       | 3     | 1                                | 5.6 x 10 <sup>-1</sup> | 23347                    | 5.25                                  | W, G, A, R, L               |
| 21040 |       |                                  |                        | 5.43                     | W, G, Lb, R, L, De, S                 | 15                          |
| 23085 |       |                                  |                        | 6.18                     | G, A, R, L, ND                        | 10                          |
| 2     |       | 5.6 x 10 <sup>-2</sup>           | 23294                  | 5.19                     | W, G, A, R, L, *                      | 8                           |
|       |       |                                  | 21413                  | 5.16                     | W, G, Lb, R, L                        | 11                          |
|       |       |                                  | 21378                  | 13.89                    | H                                     | 1                           |
| 3     |       | 5.6 x 10 <sup>-3</sup>           | 22944                  | 13.89                    | H                                     | 0                           |
|       |       |                                  | 21518                  | 13.89                    | H                                     | 0                           |
|       |       |                                  | 21428                  | 13.89                    | H                                     | 0                           |
| 4     | 1     | 5.6 x 10 <sup>-1</sup>           | 20136                  | 5.06                     | L, W, A, G, R, Lb, D                  | 12                          |
|       |       |                                  | 15859                  | 5.06                     | L, W, A, G, R, Lb, D, Sh              | 13                          |
|       |       |                                  | 20016                  | 5.06                     | L, W, A, G, R, Lb, D                  | 10                          |
|       | 2     | 5.6 x 10 <sup>-2</sup>           | 16307                  | 5.87                     | W, R, A, G, L, D, Lb                  | 11                          |
|       |       |                                  | 15855                  | 5.87                     | A, W, G, R, D, L                      | 9                           |
|       |       |                                  | 18068                  | 5.06                     | A, G, W, L, D                         | 8                           |
|       | 3     | 5.6 x 10 <sup>-3</sup>           | 19712                  | 13.87                    | H                                     | 0                           |
|       |       |                                  | 19717                  | 13.87                    | H                                     | 0                           |
|       |       |                                  | 19857                  | 13.87                    | H                                     | 0                           |

H, Healthy (0); A, Arched back (1); D, Dehydrated/Not drinking (1); Ra, Rash (1); G, Gait changes (1); W, Wasp waisted (1); R, Ruffled fur (1); ND, Nasal discharge (1); S, Sneezing (1); Sh, Shivering (1); L, Lethargic (2); V, Vomiting (2); De, Depression (2); \*, Diarrhoea (2); Lb, Laboured Breathing (3); Do, Disorientated (9), I, Immobile (9).  
Temperature >39°C (1); Temperature >40°C (2).  
Weight loss >5% from maximum (1); Weight loss >10% from maximum (2).

**Supplementary Table 2 Clinical scores.** The clinical scores were calculated according to the values in parenthesis after the clinical sign. Total clinical scores include temperature and weight changes.

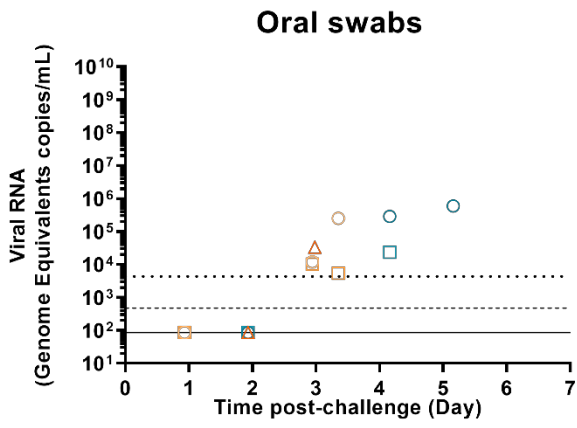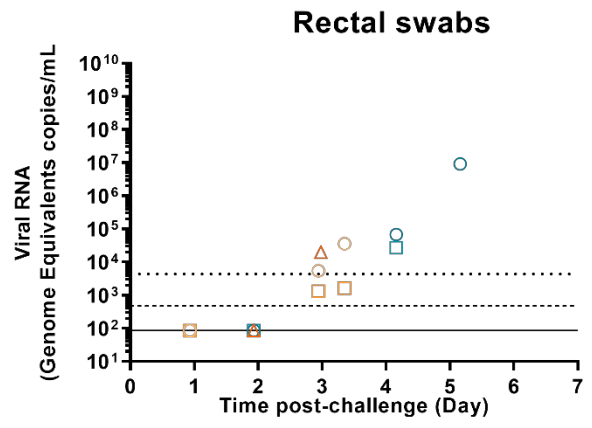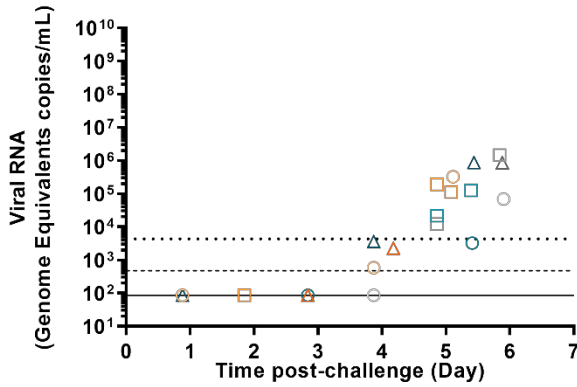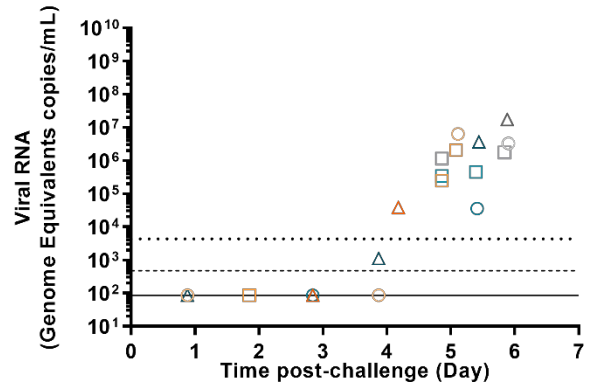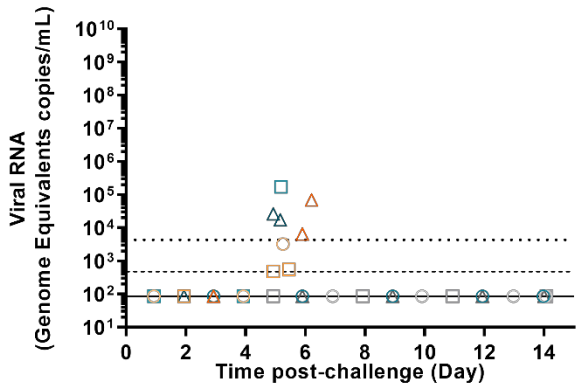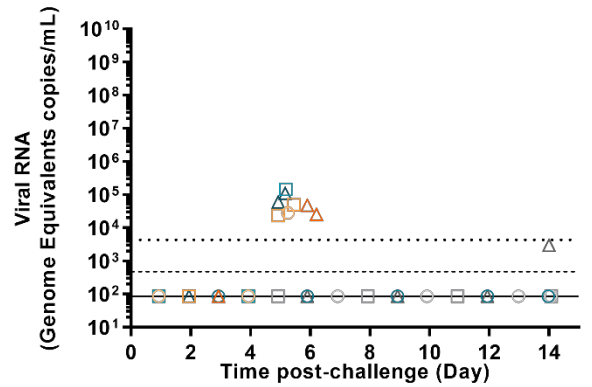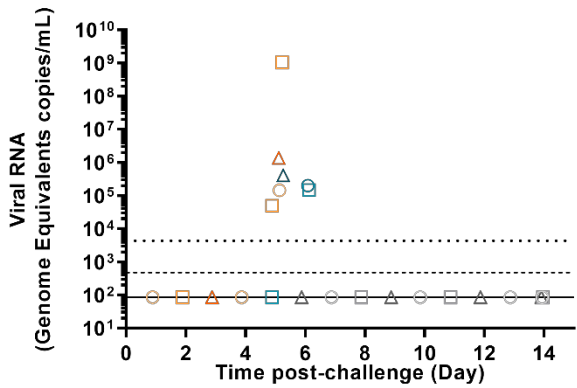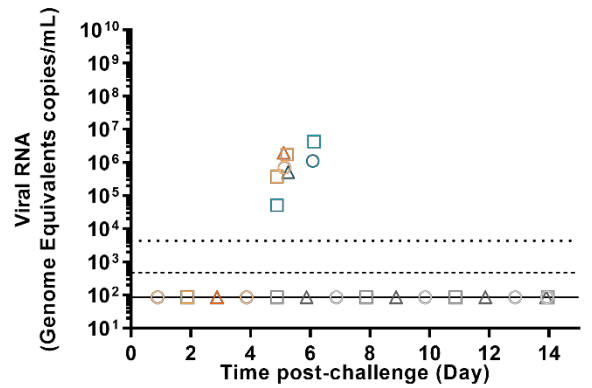

**Supplementary Fig. 3 Viral load in oral and rectal samples.** Viral load was quantified in oral and rectal swab samples by qRT-PCR. Group 1  $5.6 \times 10^{-1}$  TCID<sub>50</sub> – orange symbols, Group 2  $5.6 \times 10^{-2}$  TCID<sub>50</sub> teal symbols, Group 3  $5.6 \times 10^{-3}$  TCID<sub>50</sub> grey symbols. Upper dotted line is the lower limit of quantification (LLOQ), Dashed line is limit of detection (LOD) and solid line is the theoretical minimum detectable amount (TDMA).

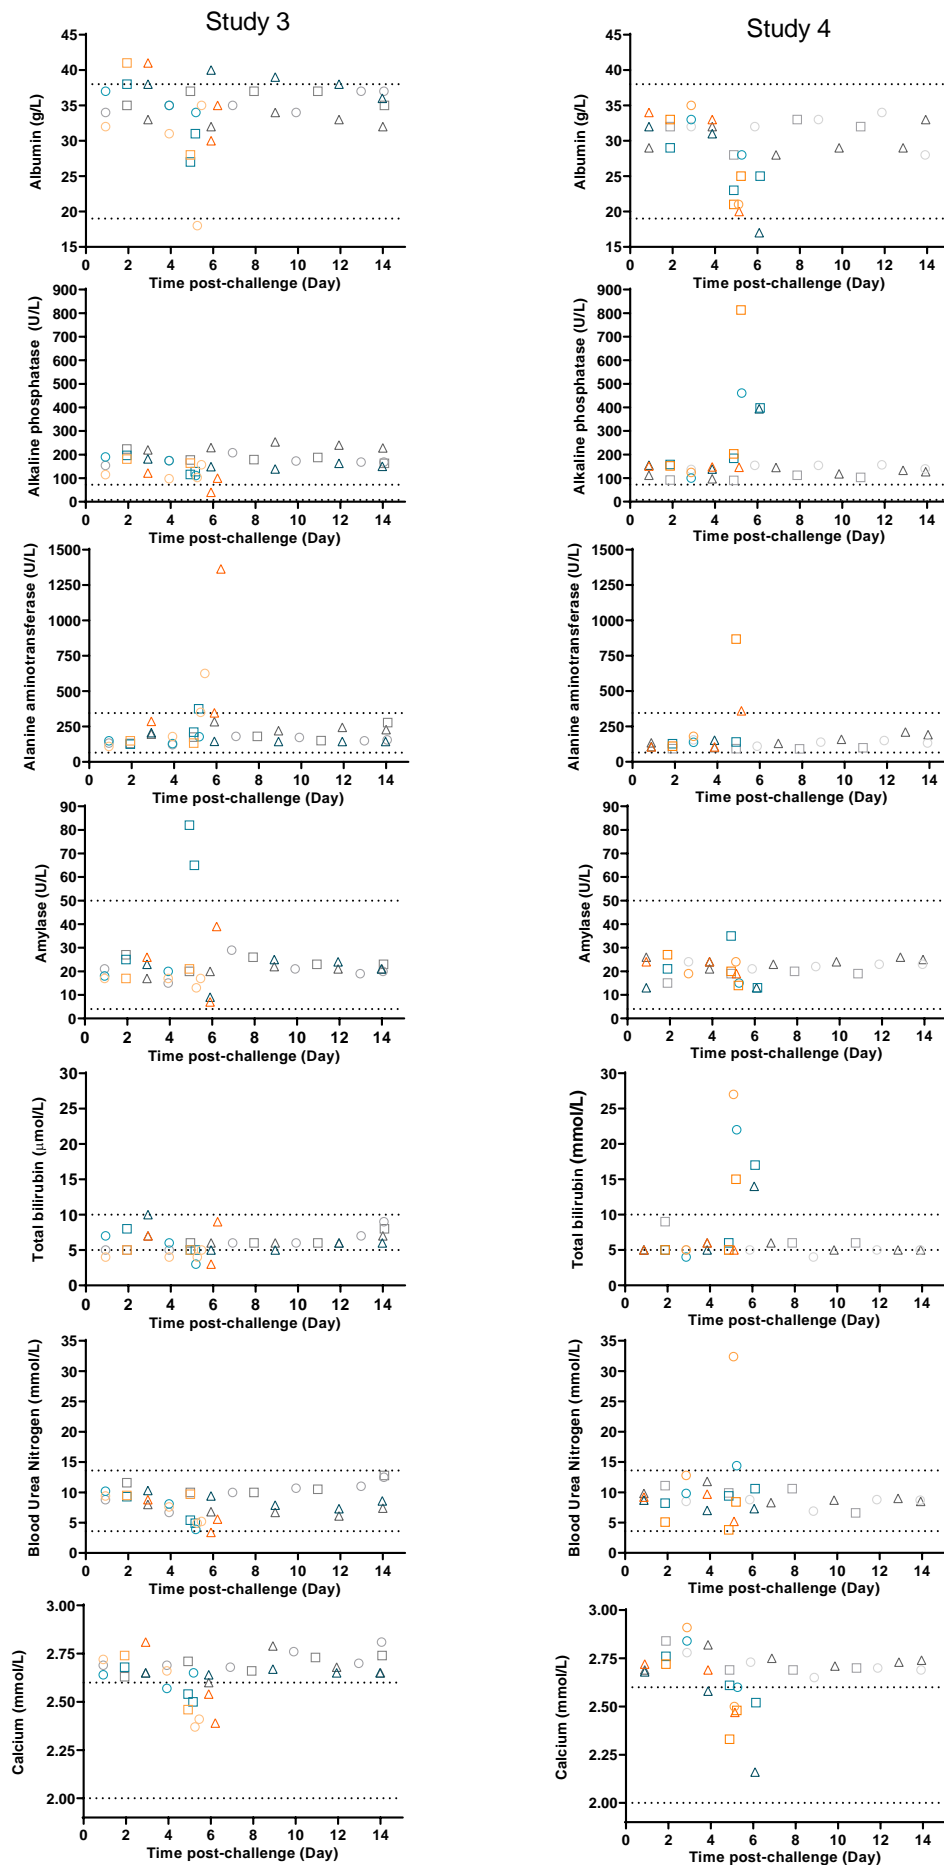

**Supplementary Fig. 4 VetScan® VS2 Comprehensive panel blood chemistry (Albumin to Calcium).** The parameters measured were albumin (ALB), alanine aminotransferase (ALT), alkaline phosphatase (ALP), amylase (AMY), total bilirubin (TBIL), and urea nitrogen (BUN) and total calcium (CA++) in heparinized whole blood. The upper and lower dashed lines represent the manufacturers reference range for a ferret. Group 1  $5.6 \times 10^{-1}$  TCID<sub>50</sub> – orange symbols, Group 2  $5.6 \times 10^{-2}$  TCID<sub>50</sub> teal symbols, Group 3  $5.6 \times 10^{-3}$  TCID<sub>50</sub> grey symbols.

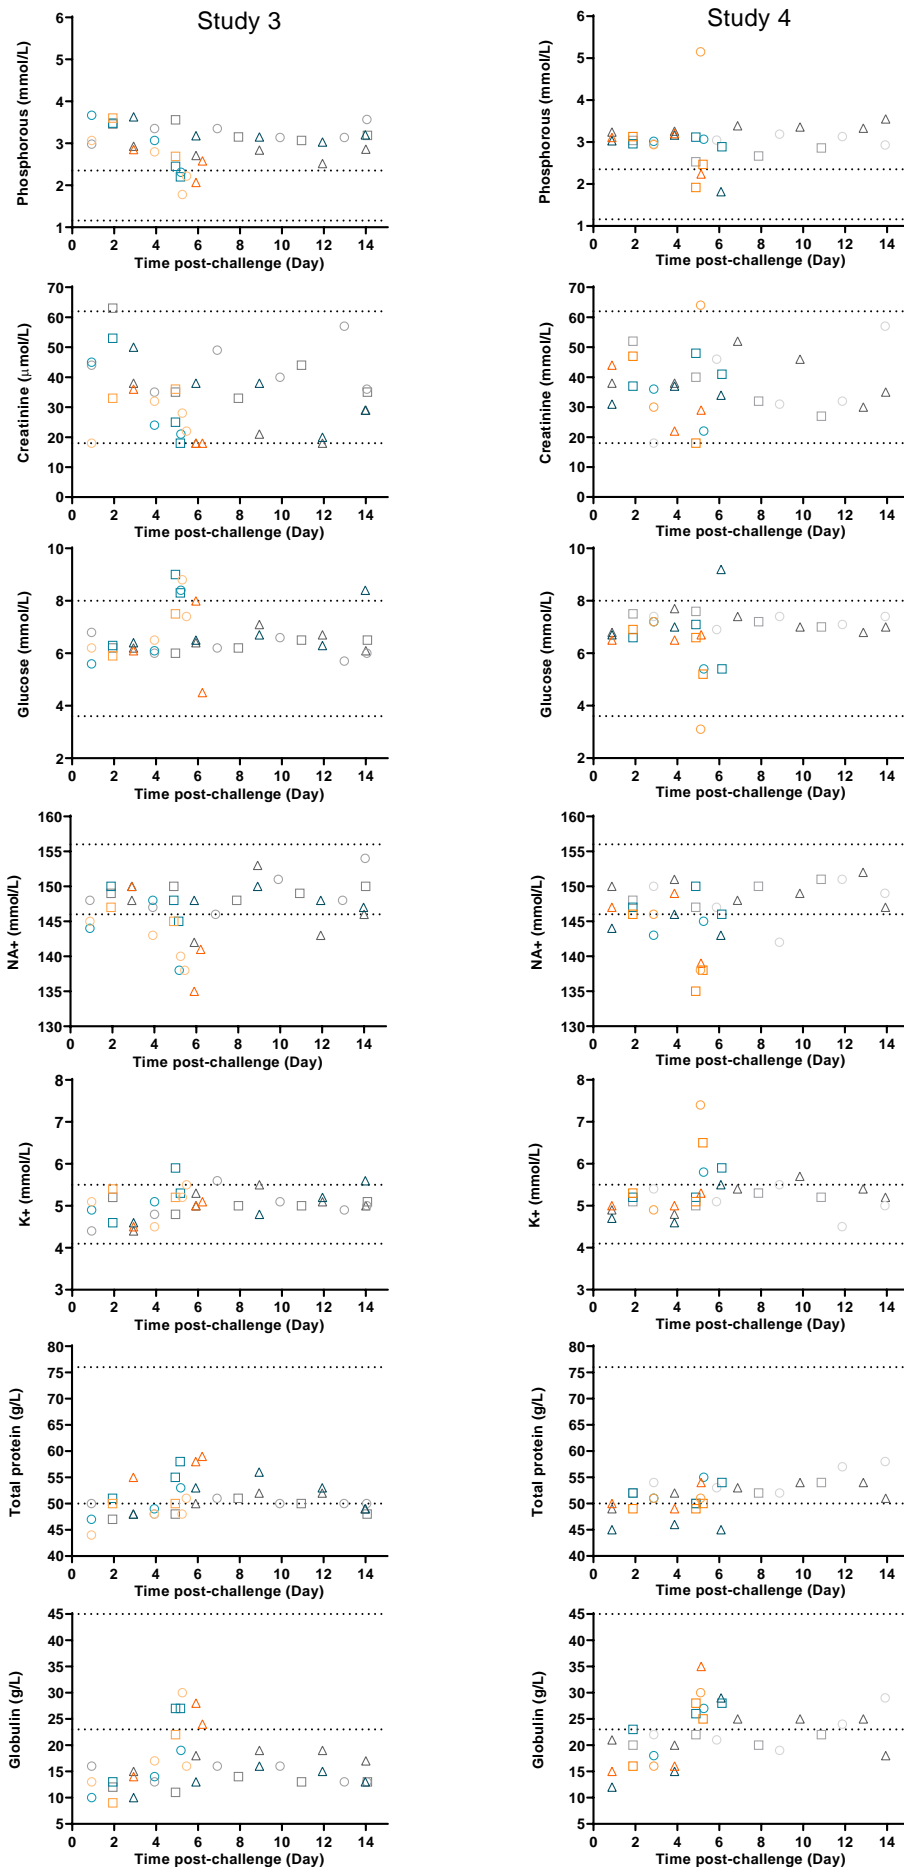

**Supplementary Fig. 5 VetScan® VS2 Comprehensive panel blood chemistry (Phosphorous to Globulin).** The parameters measured were phosphorus (PHOS), creatinine (CRE), glucose (GLU), sodium (NA+), potassium (K+), globulin (GLOB) and total protein (TP) in heparinized whole blood. The upper and lower dashed lines represent the manufacturers reference range for a ferret. Group 1  $5.6 \times 10^{-1}$  TCID<sub>50</sub> – orange symbols, Group 2  $5.6 \times 10^{-2}$  TCID<sub>50</sub> teal symbols, Group 3  $5.6 \times 10^{-3}$  TCID<sub>50</sub> grey symbols.

| Study | Group | Virus Dose (TCID <sub>50</sub> ) | Animal | Histo ref | Spleen | Liver | Lung | Kidney | Ovary | Oviduct | Testis |
|-------|-------|----------------------------------|--------|-----------|--------|-------|------|--------|-------|---------|--------|
| 1     | 1     | 5.6 x 10 <sup>4</sup>            | 18568  | 122/19    | 0.9    | 0.3   | 0    | 0.1    | 0.1   | 0.02    |        |
| 1     | 1     | 5.6 x 10 <sup>4</sup>            | 18011  | 123/19    |        |       |      |        |       |         |        |
| 1     | 1     | 5.6 x 10 <sup>4</sup>            | 18453  | 124/19    |        |       |      |        |       |         |        |
| 1     | 2     | 5.6 x 10 <sup>1</sup>            | 17193  | 125/19    | 0.7    | 1.7   | 0.2  | 0.2    | 0.3   | 0.03    |        |
| 1     | 2     | 5.6 x 10 <sup>1</sup>            | 18016  | 126/19    |        |       |      |        |       |         |        |
| 1     | 2     | 5.6 x 10 <sup>1</sup>            | 17865  | 127/19    |        |       |      |        |       |         |        |
| 2     | 1     | 5.6 x 10 <sup>1</sup>            | 00088  | 412/19    | 0.9    | 2     | 0.12 | 0.3    | 0.1   |         |        |
| 2     | 1     | 5.6 x 10 <sup>1</sup>            | 00468  | 414/19    |        |       |      |        |       |         |        |
| 2     | 1     | 5.6 x 10 <sup>1</sup>            | 16385  | 417/19    |        |       |      |        |       |         |        |
| 2     | 2     | 5.6 x 10 <sup>0</sup>            | 00230  | 413/19    | 1.5    | 0.7   | 0.2  | 0.1    |       | 0       |        |
| 2     | 2     | 5.6 x 10 <sup>0</sup>            | 00545  | 415/19    |        |       |      |        |       |         |        |
| 2     | 2     | 5.6 x 10 <sup>0</sup>            | 99894  | 419/19    |        |       |      |        |       |         |        |
| 2     | 3     | 5.6 x 10 <sup>-1</sup>           | 01755  | 416/19    | 8.9    | 4.1   | 2.3  | 0.8    | 0.3   | 0.2     |        |
| 2     | 3     | 5.6 x 10 <sup>-1</sup>           | 21954  | 418/19    |        |       |      |        |       |         |        |
| 2     | 3     | 5.6 x 10 <sup>-1</sup>           | 99938  | 420/19    |        |       |      |        |       |         |        |
| 3     | 1     | 5.6 x 10 <sup>-1</sup>           | 21040  | 455/19    | 1.54   | 0.38  | 0.02 | 0.04   | 0.02  | 0.01    |        |
| 3     | 1     | 5.6 x 10 <sup>-1</sup>           | 23085  | 461/19    | 0.62   | 0.4   | 0.04 | 0.02   | 0.04  | 0.02    |        |
| 3     | 1     | 5.6 x 10 <sup>-1</sup>           | 23347  | 463/19    |        |       |      |        |       |         |        |
| 3     | 2     | 5.6 x 10 <sup>-2</sup>           | 21378  | 456/19    |        |       |      |        |       |         |        |
| 3     | 2     | 5.6 x 10 <sup>-2</sup>           | 21413  | 457/19    | 0.8    | 0.4   | 0.07 | 0.01   | 0.01  | 0       |        |
| 3     | 2     | 5.6 x 10 <sup>-2</sup>           | 23294  | 462/19    |        |       |      |        |       |         |        |
| 3     | 3     | 5.6 x 10 <sup>-3</sup>           | 21428  | 458/19    |        |       |      |        |       |         |        |
| 3     | 3     | 5.6 x 10 <sup>-3</sup>           | 21518  | 459/19    |        |       |      |        |       |         |        |
| 3     | 3     | 5.6 x 10 <sup>-3</sup>           | 22944  | 460/19    | 0      | 0     | 0    | 0      | 0     | 0       |        |
| 4     | 1     | 5.6 x 10 <sup>-1</sup>           | 20136  | 642/19    | 6.2    | 2.6   | 0.2  | 0.17   |       |         | 0.2    |
| 4     | 1     | 5.6 x 10 <sup>-1</sup>           | 15859  | 643/19    | 11.8   | 5.4   | 1.4  | 1.5    |       |         | 2.3    |
| 4     | 1     | 5.6 x 10 <sup>-1</sup>           | 20016  | 644/19    | 7.8    | 5.9   | 1.02 | 0.82   |       |         | 1.34   |
| 4     | 2     | 5.6 x 10 <sup>-2</sup>           | 18068  | 645/19    |        |       |      |        |       |         | 0.14   |
| 4     | 2     | 5.6 x 10 <sup>-2</sup>           | 16307  | 646/19    |        |       |      |        |       |         |        |
| 4     | 2     | 5.6 x 10 <sup>-2</sup>           | 15855  | 647/19    | 5.7    | 5.4   | 0.8  | 0.4    |       |         | 0.9    |
| 4     | 3     | 5.6 x 10 <sup>-3</sup>           | 19717  | 648/19    | 0      | 0     | 0    | 0      |       |         | 0      |
| 4     | 3     | 5.6 x 10 <sup>-3</sup>           | 19712  | 649/19    | 0      | 0     | 0    | 0      |       |         | 0      |
| 4     | 3     | 5.6 x 10 <sup>-3</sup>           | 19857  | 650/19    |        |       |      |        |       |         |        |

**Supplementary Table 3. Presence of viral RNA in tissues by RNAScope.** The quantification of the presence of Zaire ebolavirus (Strain Kikwit-95) nucleic acid was calculated by the percentage of area of the whole tissue section stained positively with RNAScope. The average size of the area studied was 2-4 cm<sup>2</sup>. Green shading represents no RNAScope staining. Light orange <1% staining and dark orange > 1% staining.

|         | Group | Virus Dose (TCID <sub>50</sub> ) | Animal | Histo ref | Cornea | Lens | Vitreous | Aqueous | Retina | Choroid | Sclera | Iris | Ciliary | Optic nerve | Conjunctiva/Glands |     |
|---------|-------|----------------------------------|--------|-----------|--------|------|----------|---------|--------|---------|--------|------|---------|-------------|--------------------|-----|
| Study 1 | 1     | 5.6 x 10 <sup>4</sup>            | 18568  | 122/19    | -      | -    | -        | -       | -      | +       | -      | -    | +       | -           | -                  |     |
|         | 1     | 5.6 x 10 <sup>4</sup>            | 18011  | 123/19    | -      | -    | -        | -       | -      | -       | -      | -    | -       | -           | -                  |     |
|         | 1     | 5.6 x 10 <sup>4</sup>            | 18453  | 124/19    | -      | -    | -        | -       | -      | -       | -      | -    | -       | -           | -                  |     |
|         | 2     | 5.6 x 10 <sup>1</sup>            | 17193  | 125/19    | -      | -    | -        | -       | -      | +       | -      | +    | +       | -           | -                  |     |
|         | 2     | 5.6 x 10 <sup>1</sup>            | 18016  | 126/19    | -      | -    | -        | -       | -      | +       | -      | +    | +       | -           | +                  |     |
| Study 2 | 1     | 5.6 x 10 <sup>1</sup>            | 00088  | 412/19    | -      | -    | -        | -       | -      | +       | -      | +    | +       | N/A         | N/A                |     |
|         | 1     | 5.6 x 10 <sup>1</sup>            | 00468  | 414/19    | -      | -    | -        | -       | -      | -       | -      | -    | -       | -           | -                  |     |
|         | 1     | 5.6 x 10 <sup>1</sup>            | 16385  | 417/19    | -      | -    | -        | -       | -      | +       | -      | +    | -       | -           | +++                |     |
|         | 2     | 5.6 x 10 <sup>1</sup>            | 00230  | 413/19    | -      | -    | -/+      | -       | -      | +       | -      | -    | -       | -           | -                  | N/A |
|         | 2     | 5.6 x 10 <sup>0</sup>            | 00545  | 415/19    | -      | -    | -/+      | -       | -      | +       | -      | +    | +++     | N/A         | +++                |     |
|         | 2     | 5.6 x 10 <sup>0</sup>            | 99894  | 419/19    | -      | -    | -        | -       | -      | +++     | -      | +    | +++     | -           | -                  | N/A |
|         | 3     | 5.6 x 10 <sup>0</sup>            | 01755  | 416/19    | -      | -    | -/+      | -       | -      | +       | -      | +++  | +++     | N/A         | +++                |     |
|         | 3     | 5.6 x 10 <sup>-1</sup>           | 21954  | 418/19    | -      | -    | -        | -       | -      | +       | -      | +    | +       | +           | +                  | +   |
|         | 3     | 5.6 x 10 <sup>-1</sup>           | 99938  | 420/19    | -      | -    | -        | -       | -      | +       | -      | +    | +       | -           | -                  | N/A |
| Study 3 | 1     | 5.6 x 10 <sup>-1</sup>           | 21040  | 455/19    | -      | -    | -        | -       | -      | +       | -      | +    | +       | N/A         | -                  |     |
|         | 1     | 5.6 x 10 <sup>-1</sup>           | 23085  | 461/19    | -      | -    | -        | -       | -      | -       | -      | +    | -       | -           | -                  |     |
|         | 1     | 5.6 x 10 <sup>-1</sup>           | 23347  | 463/19    | -      | -    | -        | -       | -      | -       | -      | -    | -       | N/A         | N/A                |     |
|         | 2     | 5.6 x 10 <sup>-1</sup>           | 21413  | 457/19    | -      | N/A  | -        | -       | -      | -       | -      | -    | -       | N/A         | N/A                |     |
|         | 2     | 5.6 x 10 <sup>-2</sup>           | 23294  | 462/19    | -      | -    | -        | -       | -      | -       | -      | -    | -       | -           | -                  |     |
|         | 2     | 5.6 x 10 <sup>-2</sup>           | 21378  | 456/19    | -      | -    | -        | -       | -      | -       | -      | -    | -       | -           | -                  |     |
|         | 3     | 5.6 x 10 <sup>-2</sup>           | 21428  | 458/19    | -      | -    | -        | -       | -      | -       | -      | -    | -       | -           | N/A                | -   |
|         | 3     | 5.6 x 10 <sup>-3</sup>           | 21518  | 459/19    | -      | -    | -        | -       | -      | -       | -      | -    | -       | -           | N/A                | N/A |
|         | 3     | 5.6 x 10 <sup>-3</sup>           | 22944  | 460/19    | -      | -    | -        | -       | -      | -       | -      | -    | -       | -           | -                  | -   |
| Study 4 | 1     | 5.6 x 10 <sup>-3</sup>           | 20136  | 642/19    | -      | -    | -        | -       | -      | +       | -      | +    | +       | N/A         | +++                |     |
|         | 1     | 5.6 x 10 <sup>-1</sup>           | 15859  | 643/19    | -      | -    | -/+      | -       | -      | +++     | -      | +    | +++     | N/A         | +++                |     |
|         | 1     | 5.6 x 10 <sup>-1</sup>           | 20016  | 644/19    | -      | -    | -/+      | -       | -      | +++     | -      | +++  | +++     | +++         | +++                |     |
|         | 2     | 5.6 x 10 <sup>-1</sup>           | 18068  | 645/19    | -      | -    | -        | -       | -      | +++     | -      | +    | +       | N/A         | +                  |     |
|         | 2     | 5.6 x 10 <sup>-2</sup>           | 16307  | 646/19    | -      | -    | -        | -       | -      | +++     | -      | +    | +       | N/A         | +++                |     |
|         | 2     | 5.6 x 10 <sup>-2</sup>           | 15855  | 647/19    | -      | -    | -        | -       | -      | +++     | -      | +++  | +++     | +++         | +++                |     |
|         | 3     | 5.6 x 10 <sup>-2</sup>           | 19717  | 648/19    | -      | -    | -        | -       | -      | -       | -      | -    | -       | -           | -                  |     |
|         | 3     | 5.6 x 10 <sup>-3</sup>           | 19712  | 649/19    | -      | -    | -        | -       | -      | -       | -      | -    | -       | -           | -                  |     |
|         | 3     | 5.6 x 10 <sup>-3</sup>           | 19857  | 650/19    | -      | -    | -        | -       | -      | -/+     | -      | -    | -       | -           | -                  | -   |

**Supplementary Table 4. Presence of viral RNA in eyes by RNAScope.** The quantification of the presence of Zaire ebolavirus (Strain Kikwit-95) nucleic acid was evaluated as absent (-), low (+), medium (++) or high (+++). Nineteen out of 25 animals that reached their euthanasia endpoint stained positively for viral RNA in at least one eye structure.
